# Supplementary material for: Prevalence and Diversity of Salmonella Serotypes in Ecuadorian Broilers at Slaughter Age
Source: PubMed Central journal article supplement (PMC4944992; doi:10.1371/journal.pone.0159567), 2016-07-14
Supplement: pone.0159567.s001.pdf [file pone.0159567.s001.pdf]

Figure A. ERIC-PCR profiles of the 59 tested *Salmonella* isolates.

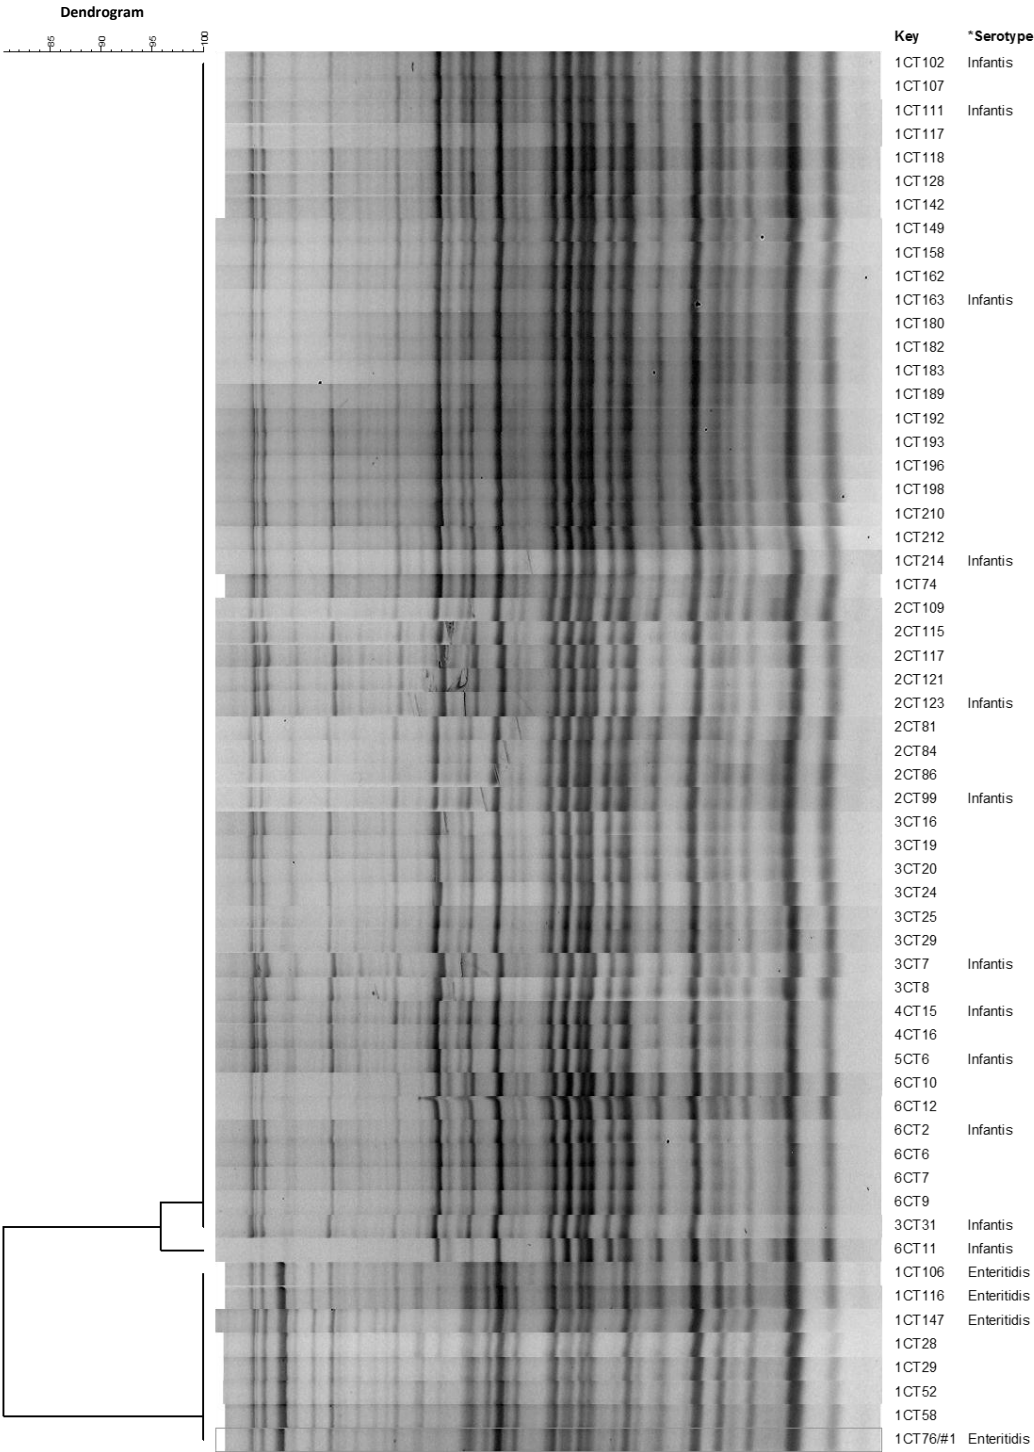

\* Selected isolates for serotyping according to the Kaufmann-White scheme

**Figure B. PFGE profiles of the 62 *Salmonella* isolates collected from the positive broiler batches.**

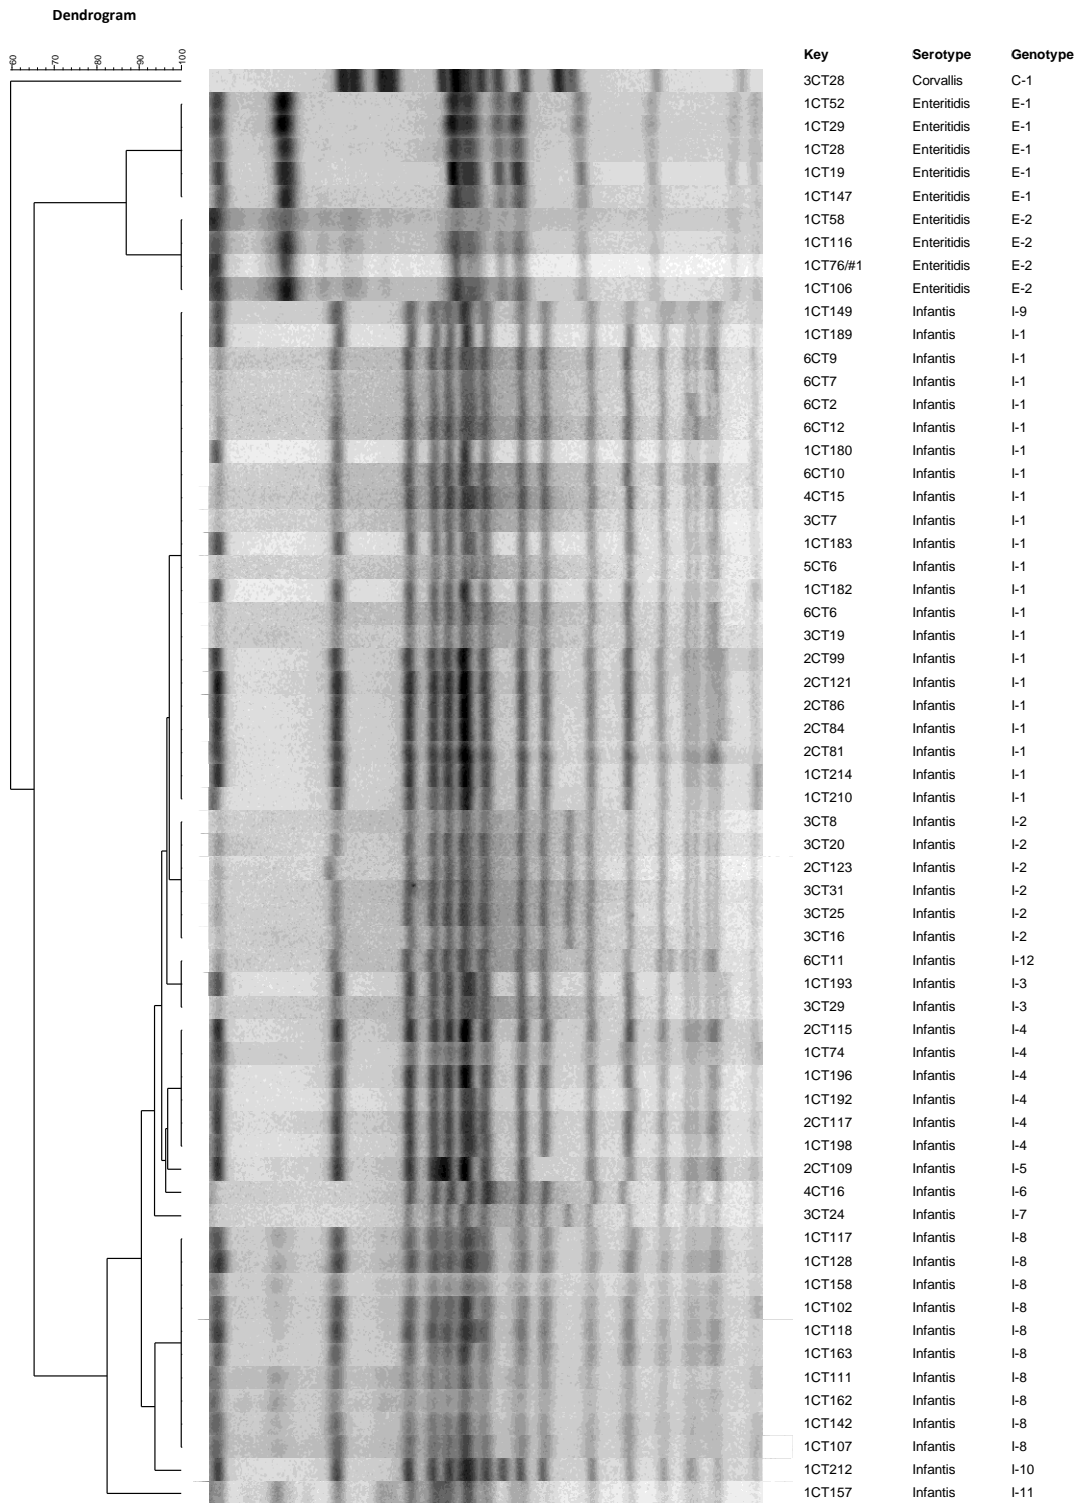

**Table A. Distribution of the minimal inhibitory concentration values for the 62 *Salmonella* isolates collected from the positive broiler batches**

| Antibiotic       | Number of <i>Salmonella</i> isolates with minimal inhibitory concentrations ( $\mu\text{g}/\mu\text{l}$ ) |      |      |      |      |     |   |    |    |   |    |    |    |     |     |     |      |
|------------------|-----------------------------------------------------------------------------------------------------------|------|------|------|------|-----|---|----|----|---|----|----|----|-----|-----|-----|------|
|                  | 0,02                                                                                                      | 0,03 | 0,06 | 0,12 | 0,25 | 0,5 | 1 | 2  | 4  | 8 | 16 | 32 | 64 | 128 | 256 | 512 | 1024 |
| Sulfamethoxazole |                                                                                                           |      |      |      |      |     |   |    |    |   |    |    | 2  | 2   | 3   | 1   | 54   |
| Gentamicin       |                                                                                                           |      |      | 12   | 8    |     | 1 | 15 | 23 | 3 |    |    |    |     |     |     |      |
| Ciprofloxacin    | 5                                                                                                         | 2    | 3    | 20   | 26   | 6   |   |    |    |   |    |    |    |     |     |     |      |
| Ampicillin       |                                                                                                           |      |      |      | 4    | 9   | 6 | 1  |    |   |    |    |    | 42  |     |     |      |
| Cefotaxime       |                                                                                                           |      | 8    | 8    | 1    | 1   | 1 |    | 42 |   |    |    |    | 1   |     |     |      |
| Ceftazidime      |                                                                                                           |      |      |      | 11   | 5   | 6 | 36 | 4  |   |    |    |    |     |     |     |      |
| Tetracycline     |                                                                                                           |      |      |      |      |     | 5 | 4  | 2  | 1 | 1  | 48 | 1  |     |     |     |      |
| Streptomycin     |                                                                                                           |      |      |      |      |     |   | 3  | 5  | 2 | 3  | 31 | 15 | 3   |     |     |      |
| Trimethopim      |                                                                                                           |      |      |      |      | 11  | 1 |    |    | 2 | 1  | 47 |    |     |     |     |      |
| Chloramphenicol  |                                                                                                           |      |      |      |      |     |   | 13 | 6  | 2 | 1  | 1  | 39 |     |     |     |      |
| Colistin         |                                                                                                           |      |      |      |      |     |   | 52 | 10 |   |    |    |    |     |     |     |      |
| Florfenicol      |                                                                                                           |      |      |      |      |     |   | 14 | 4  | 2 |    | 1  | 41 |     |     |     |      |
| Kanamycin        |                                                                                                           |      |      |      |      |     |   |    | 30 |   |    |    | 2  | 30  |     |     |      |
| Nalidixic acid   |                                                                                                           |      |      |      |      |     |   |    | 7  | 1 | 1  |    | 53 |     |     |     |      |

Full vertical lines indicate epidemiological break points for resistance described by European Committee on Antimicrobial Susceptibility Testing (EUCAST, 2015). Clinical break points for resistance described by the Clinical and Laboratory Standards Institute (CLSI, 2014) were used for Kanamycin and Sulfamethoxazole.
